# Supplementary material
Source: MDPI journal article supplement (https://www.mdpi.com/2076-3263/13/7/191)
Supplement: s1 [file s1 › geosciences-2346187-supplementary.pdf]

# Questionnaire on coastal erosion

## 1. Gender

|                          |      |                          |        |
|--------------------------|------|--------------------------|--------|
| <input type="checkbox"/> | Male | <input type="checkbox"/> | Female |
|--------------------------|------|--------------------------|--------|

## 2. Age

|                          |                                    |                          |                       |                          |                       |                          |                       |                          |                                  |
|--------------------------|------------------------------------|--------------------------|-----------------------|--------------------------|-----------------------|--------------------------|-----------------------|--------------------------|----------------------------------|
| <input type="checkbox"/> | Younger<br>than 25<br>years<br>old | <input type="checkbox"/> | 26-35<br>years<br>old | <input type="checkbox"/> | 36-45<br>years<br>old | <input type="checkbox"/> | 46-55<br>years<br>old | <input type="checkbox"/> | Older<br>than 55<br>years<br>old |
|--------------------------|------------------------------------|--------------------------|-----------------------|--------------------------|-----------------------|--------------------------|-----------------------|--------------------------|----------------------------------|

## 3. Education level

|                                                                         |                          |
|-------------------------------------------------------------------------|--------------------------|
| Highschool                                                              | <input type="checkbox"/> |
| After high school education<br>(e.g., Institute of Vocational Training) | <input type="checkbox"/> |
| Bachelor                                                                | <input type="checkbox"/> |
| Master                                                                  | <input type="checkbox"/> |
| PhD                                                                     | <input type="checkbox"/> |

## 4. Location of residence (place a pin on the map).

## 5. When you visit the beach, you are (one or more answers).

|                    |                          |
|--------------------|--------------------------|
| Permanent resident | <input type="checkbox"/> |
| Local visitor      | <input type="checkbox"/> |
| Tourist            | <input type="checkbox"/> |

## 6. How often do you visit the beach during the summer?

|                     |                          |
|---------------------|--------------------------|
| Every day           | <input type="checkbox"/> |
| 2-3 times per week  | <input type="checkbox"/> |
| 1 time per week     | <input type="checkbox"/> |
| 1-2 times per month | <input type="checkbox"/> |
| Other               | <input type="checkbox"/> |

## 7. Do you visit the beach any other time apart from the summer?

|     |                          |
|-----|--------------------------|
| Yes | <input type="checkbox"/> |
| No  | <input type="checkbox"/> |

8. If your answer to the previous question was Yes:

A) How often do you visit the beach apart from the summer season?

|                     |  |
|---------------------|--|
| Every day           |  |
| 2-3 times per week  |  |
| 1 time per week     |  |
| 1-2 times per month |  |
| Other               |  |

B) Why do you visit the beach?

|          |  |
|----------|--|
| Swimming |  |
| Walk     |  |
| Camping  |  |
| Fishing  |  |
| Sailing  |  |
| Other    |  |

9. Do you know about the phenomenon of coastal erosion?

|               |  |
|---------------|--|
| Yes           |  |
| No            |  |
| I am not sure |  |

10. If your answer was Yes, in your opinion, which factors are responsible for coastal erosion? (one or more answers)

|                                                         |  |
|---------------------------------------------------------|--|
| Climate change (sea level rise, extreme weather events) |  |
| Material removal from the beach                         |  |
| Geotechnical constructions on the coastal zone          |  |
| Interventions of local administrations                  |  |
| Indifference of local administrations                   |  |
| Interventions by private individuals                    |  |

11. In your opinion, which are the main problems caused by coastal erosion? (one or more answers)

|                                                      |  |
|------------------------------------------------------|--|
| Loss of land                                         |  |
| Loss of benefits to the local community from tourism |  |
| Degradation of coastal ecosystems                    |  |
| Loss of natural beauty                               |  |
| I do not know                                        |  |

**12. Have you noticed any changes on the beaches in the last ....**

|                                |  |
|--------------------------------|--|
| 1-2 years                      |  |
| 5-10 years                     |  |
| 10-20 years                    |  |
| 20-30 years                    |  |
| I have not noticed any changes |  |

**13. If your answer was Yes, what changes have you noticed?**

|                                                                       |  |
|-----------------------------------------------------------------------|--|
| Coastline retreat                                                     |  |
| Loss of sand                                                          |  |
| Infrastructure (piers, restaurants, hotels, etc.)                     |  |
| Construction of protective works<br>(breakwaters, sea walls, jetties) |  |

**14. Note in which place or places you have noticed any changes.**

|  |
|--|
|  |
|--|

**15. In the case of coastal erosion, in what direction do you think the state should act in the near future in order to control (or prevent) the phenomenon? Rate the options below on a scale from 1 to 5, with 1 (not important), 2 (less important), 3 (indifferent), 4 (quite important), and 5 (very important).**

Installation of a monitoring system for the phenomenon on an annual basis

1 ..... 2 ..... 3 ..... 4 ..... 5 .....

Limiting tourist activities

1 ..... 2 ..... 3 ..... 4 ..... 5 .....

Prohibition of sand removal

1 ..... 2 ..... 3 ..... 4 ..... 5 .....

Installment of protective works (breakwaters, etc.)

1 ..... 2 ..... 3 ..... 4 ..... 5 .....

**16. In your opinion, protecting the coast from erosion should be:**

|                      |  |
|----------------------|--|
| Priority             |  |
| Important            |  |
| Not so important     |  |
| Not important at all |  |
| I do not know        |  |

17. On the beaches you have visited, have you noticed a natural elongated rocky surface (slab) along the coastline (i.e., beachrock)?

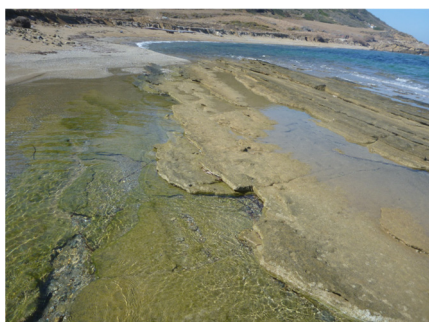

|               |  |
|---------------|--|
| Yes           |  |
| No            |  |
| I am not sure |  |

18. If your answer was Yes, which of the following expresses your appreciation for this slab? (one or more answers)

|                                                  |  |
|--------------------------------------------------|--|
| Destroy slab to ease access                      |  |
| Destroy slab at certain pints to ease access     |  |
| Enrich beach with sand to cover the slab         |  |
| Maintain slab                                    |  |
| Protective measures to avoid destruction of slab |  |
| None of the above                                |  |
| Indifferent                                      |  |

19. Please rate how anxious the following natural hazards make you feel.

|                   | Earthquakes | Fires | Coastal erosion | Landslides | Tsunamis |
|-------------------|-------------|-------|-----------------|------------|----------|
| No concern        |             |       |                 |            |          |
| Little concern    |             |       |                 |            |          |
| Concern           |             |       |                 |            |          |
| Important concern |             |       |                 |            |          |
| Great concern     |             |       |                 |            |          |

20. Based on your knowledge, your personal estimation, or information from the media, the coastal erosion hazard in Greece is:

|               |  |
|---------------|--|
| Increasing    |  |
| Stable        |  |
| Controlled    |  |
| Reducing      |  |
| Non-existent  |  |
| I do not know |  |

**21. You are on the beach and observe researchers with measuring instruments. How would you react?**

|                                                           |  |
|-----------------------------------------------------------|--|
| I would not care                                          |  |
| I would be bothered by their presence                     |  |
| I would be interested in their research and approach them |  |
| None of the above                                         |  |

**22. How would you rate the level of information and warnings from the responsible authorities about coastal erosion?**

|                 |  |
|-----------------|--|
| Quite adequate  |  |
| Adequate        |  |
| So and so       |  |
| Inadequate      |  |
| Very inadequate |  |

**23. Is your professional training related to environmental sciences?**

|     |  |
|-----|--|
| Yes |  |
| No  |  |
